# Supplementary material for: Development of an In Vitro Propagation Protocol and a Sequence Characterized Amplified Region (SCAR) Marker of Viola serpens Wall. ex Ging
Source: MDPI journal article supplement (doi:10.3390/plants9020246), 2020-02-14
Supplement: s1 [file s1]

# Supplementary Material

**Table S1.** Effect of different plant growth regulators (PGR's) on leaf explants of *Viola serpens* for callus formation.

| Plant Growth Regulators | Concentrations (mg/L) | Callusing | No. of Days | Percentage of Explants Responded (%) |
|-------------------------|-----------------------|-----------|-------------|--------------------------------------|
| MS medium               | -                     | -         | 50–60 days  | 0                                    |
|                         | 0.10                  | -         |             |                                      |
|                         | 0.25                  | -         |             |                                      |
|                         | 0.50                  | -         |             |                                      |
| MS + NAA                | 0.75                  | -         | 50–60 days  | 0                                    |
|                         | 0.85                  | -         |             |                                      |
|                         | 1.00                  | -         |             |                                      |
|                         | 1.50                  | -         |             |                                      |
|                         | 2.0                   | -         |             |                                      |
|                         | 2.5                   | -         |             |                                      |
|                         | 0.10                  | -         |             |                                      |
|                         | 0.25                  | -         |             |                                      |
| MS + BAP                | 0.50                  | -         | 50 days     | 15                                   |
|                         | 0.75                  | -         |             |                                      |
|                         | 0.85                  | -         |             |                                      |
|                         | 1.00                  | -         |             |                                      |
|                         | 1.50                  | -         |             |                                      |
|                         | 2.0                   | +         |             |                                      |
|                         | 2.5                   | -         |             |                                      |
|                         | 0.10                  | -         |             |                                      |
|                         | 0.25                  | -         |             |                                      |
|                         | 0.35                  | -         |             |                                      |
| MS + 2,4-D              | 0.40                  | -         | 25 days     | 10                                   |
|                         | 0.50                  | +         |             |                                      |
|                         | 1.0                   | -         |             |                                      |
|                         | 1.50                  | -         |             |                                      |
|                         | 2.0                   | -         |             |                                      |
|                         | 2.5                   | -         |             |                                      |
|                         | 0.10                  | -         |             |                                      |
|                         | 0.25                  | -         |             |                                      |
|                         | 0.50                  | -         |             |                                      |
|                         | 0.75                  | -         |             |                                      |
| MS + KIN                | 0.85                  | -         | 50–60 days  | 0                                    |
|                         | 1.00                  | -         |             |                                      |
|                         | 1.50                  | -         |             |                                      |
|                         | 2.0                   | -         |             |                                      |
|                         | 2.5                   | -         |             |                                      |
|                         | 1.0 + 0.11            | +         |             |                                      |
|                         | 1.5 + 0.12            | -         |             |                                      |
|                         | 2.0 + 0.13            | +         |             |                                      |
| MS + BAP + 2,4-D        | 2.5 + 0.14            | +         | 45 days     | 88.5                                 |
|                         | 2.5 + 0.15            | +         |             |                                      |
|                         | 1.0 + 0.25            | -         |             |                                      |
|                         | 1.5 + 0.5             | -         |             |                                      |
|                         | 2.0 + 0.5             | -         |             |                                      |
| MS + BAP + IAA          | 2.5 + 0.75            | -         | 25 days     | -                                    |
|                         | 2.5 + 1.0             | +         |             |                                      |
|                         |                       |           |             |                                      |

|                         |                  |   |            |    |
|-------------------------|------------------|---|------------|----|
| MS + BAP + 2,4- D + KIN | 1.5 + 1.0 + 0.2  | + | 50–60 days | 40 |
|                         | 1.0 + 1.0 + 0.4  | + |            | 35 |
|                         | 1.25 + 1.0 + 0.5 | - |            | -  |
|                         | 1.25 + 1.0 + 0.1 | - |            | -  |
|                         | 1.5 + 1.0 + 0.3  | + |            | 45 |
|                         | 2.0 + 0.8        | + |            | 45 |
| MS + NAA + KIN          | 2.2 + 0.8        | + | 40 days    | 38 |
|                         | 2.3 + 0.9        | - |            | -  |
|                         | 2.0 + 0.5        | - |            | -  |
|                         | 2.5 + 0.5        | - |            | -  |
|                         |                  |   |            |    |

**Table S2.** RAPD Primers along with sequences.

| SN | Sequences (5' → 3') | Primers |
|----|---------------------|---------|
| 1  | AGACGGCTCC          | OPAA-01 |
| 2  | GAGACCAGAC          | OPAA-02 |
| 3  | TTAGCGCCCC          | OPAA-03 |
| 4  | AGGACTGCTC          | OPAA-04 |
| 5  | GGCTTTAGCC          | OPAA-05 |
| 6  | TCAAGCTAAC          | OPAA-06 |
| 7  | CTACGCTCAC          | OPAA-07 |
| 8  | TCCGCAGTAG          | OPAA-08 |
| 9  | AGATGGGCAG          | OPAA-09 |
| 10 | TGGTCGGGTG          | OPAA-10 |
| 11 | ACCCGACCTG          | OPAA-11 |
| 12 | GGACCTCTTG          | OPAA-12 |
| 13 | GAGCGTCGCT          | OPAA-13 |
| 14 | AACGGGCCAA          | OPAA-14 |
| 15 | ACGGAAGCCC          | OPAA-15 |
| 16 | AAGCCTCGTC          | BG-01   |
| 17 | TGCGTGCTTG          | BG-02   |
| 18 | GACGGATCAG          | BG-03   |
| 19 | CACACTCCAG          | BG-04   |
| 20 | CACACTCCAG          | BG-05   |

**Table S3:** Number of intensive amplification products generated by 20 arbitrary primers in different accessions of *Viola serpens*.

| Primer code | Accession V1 | Accession V2 | Accession V3 | Accession V4 | Accession V5 | Accession V6 |
|-------------|--------------|--------------|--------------|--------------|--------------|--------------|
| OPAA- 01    | 5            | 5            | 6            | 5            | 5            | 7            |
| OPAA- 02    | ---          | ---          | ---          | ---          | ---          | ---          |
| OPAA- 03    | 9            | 8            | 6            | 9            | 8            | 9            |
| OPAA- 04    | 8            | 9            | 9            | 8            | 8            | 6            |
| OPAA- 05    | ---          | ---          | ---          | ---          | ---          | ---          |
| OPAA- 06    | ---          | ---          | ---          | ---          | ---          | ---          |
| OPAA- 07    | 4            | 5            | 6            | 5            | 5            | 5            |
| OPAA- 08    | 5            | 6            | 5            | 4            | 6            | 5            |
| OPAA- 09    | 6            | 8            | 6            | 8            | 8            | 6            |
| OPAA- 10    | 4            | 6            | 5            | 4            | 3            | 4            |
| OPAA- 11    | ---          | ---          | ---          | ---          | ---          | ---          |
| OPAA- 12    | ---          | ---          | ---          | ---          | ---          | ---          |
| OPAA- 13    | ---          | ---          | ---          | ---          | ---          | ---          |
| OPAA- 14    | ---          | ---          | ---          | ---          | ---          | ---          |
| OPAA- 15    | ---          | ---          | ---          | ---          | ---          | ---          |
| BG- 01      | ---          | ---          | ---          | ---          | ---          | ---          |
| BG- 02      | 5            | 6            | 6            | 5            | 6            | 6            |
| BG- 03      | ---          | ---          | ---          | ---          | ---          | ---          |
| BG- 04      | ---          | ---          | ---          | ---          | ---          | ---          |

|               |     |     |     |     |     |     |
|---------------|-----|-----|-----|-----|-----|-----|
| <b>BG- 05</b> | --- | --- | --- | --- | --- | --- |
|---------------|-----|-----|-----|-----|-----|-----|

**Table S4:** Commercial crude drug samples collected from the market place of New Delhi, India.

| <b>S. No.</b> | <b>Trade Name</b> | <b>Sample Code</b> | <b>Product Character</b> |
|---------------|-------------------|--------------------|--------------------------|
| 1             | Banafsha          | B1                 | crimped leaves           |
| 2             | Banafsha          | B2                 | Powder                   |
| 3             | Banafsha          | B3                 | dried stem               |
| 4             | Banafsha          | B4                 | powder                   |
| 5             | Banafsha          | B5                 | crimped leaves           |
| 6             | Banafsha          | B6                 | powder                   |
| 7             | Banafsha          | B7                 | dried stem               |
| 8             | Banafsha          | B8                 | crimped leaves           |
| 9             | Banafsha          | B9                 | powder                   |
